# Supplementary material
Source: PubMed Central journal article supplement (PMC8828669)
Supplement: NIHMS1757573-supplement-1.pdf [file NIHMS1757573-supplement-1.pdf]

# Supplementary Table S1

| Tyrosine kinase inhibitor | IC50                                                             |                                                             |                  |                                                         |
|---------------------------|------------------------------------------------------------------|-------------------------------------------------------------|------------------|---------------------------------------------------------|
| <b>Crizotinib</b>         | ROS1                                                             | c-MET                                                       | ALK              |                                                         |
|                           | Cell-free assay                                                  | A549, MDA-MB-231, GTL-16, HT29, 786-O, Colo-205, A498 cells | Karpas299 cells  |                                                         |
|                           | <0.025 nM(Ki)                                                    | 11 nM                                                       | 24 nM            |                                                         |
|                           | PMID: 25733882                                                   | PMID: 17483355                                              |                  |                                                         |
| <b>Savolitinib</b>        | c-MET                                                            | p-MET                                                       | c-MET            |                                                         |
|                           | Cell-free assay                                                  | Cell-free assay                                             | NCI-H441         |                                                         |
|                           | 5 nM                                                             | 3 nM                                                        | 6 nM             |                                                         |
|                           | PMID: 25148209                                                   |                                                             | PMID: 25148209   |                                                         |
| <b>Capmatinib</b>         | c-MET                                                            | c-MET                                                       |                  |                                                         |
|                           | cell-free assay                                                  | MKN45, NCI-H1993, SNU5                                      |                  |                                                         |
|                           | 0.13 nM                                                          | 1.7-2.7 nM                                                  |                  |                                                         |
|                           | PMID: 21918175                                                   | PMID: 28411455, 30871613                                    |                  |                                                         |
| <b>Cabozantinib</b>       | VEGFR2/KDR                                                       | c-Met                                                       | Axl              | c-Met                                                   |
|                           | Cell-free assay                                                  | Cell-free assay                                             | Cell-free assay  | TPR-MET BA/F3, EBC1, MKN45, Hs746T, SNU5                |
|                           | 0.035 nM                                                         | 1.3 nM                                                      | 7 nM             | 6.9-51.4 nM                                             |
|                           | PMID: 21613405                                                   |                                                             |                  | PMID: 30248654; 27068889, 21926191                      |
| <b>Glesatinib</b>         | c-MET                                                            | RON                                                         | VEGFR1/2/3       | c-MET                                                   |
|                           | Cell-free assay                                                  | Cell-free assay                                             | Cell-free assay  | MKN45, MNNG-HOS, and SNU-5                              |
|                           | 1 nM                                                             | 2 nM                                                        | 3-4 nM           | 6-30 nM                                                 |
|                           | Bonfils C. et al. AACR 2012 Annual Meeting, 2012. Abstract 1790. |                                                             |                  | Beaulieu N. et al. 20th EORTC-NCI-AACR Symposium, 2008. |
| <b>Merestinib</b>         | c-MET                                                            | DDR1                                                        | AXL              | FLT3                                                    |
|                           | Cell-free assay                                                  | Cell-based assay                                            | Cell-based assay | Cell-based assay                                        |
|                           | 2 nM (Ki)                                                        | 0.1 nM                                                      | 2 nM             | 7 nM                                                    |
|                           | PMID: 23275061                                                   | PMID: 23275061                                              |                  |                                                         |

**Supplementary Table S1.** Cell-free and/or cell-based IC50 values for MET TKIs and some of their tyrosine kinase targets

# Supplementary Figure S1

**Crizotinib**

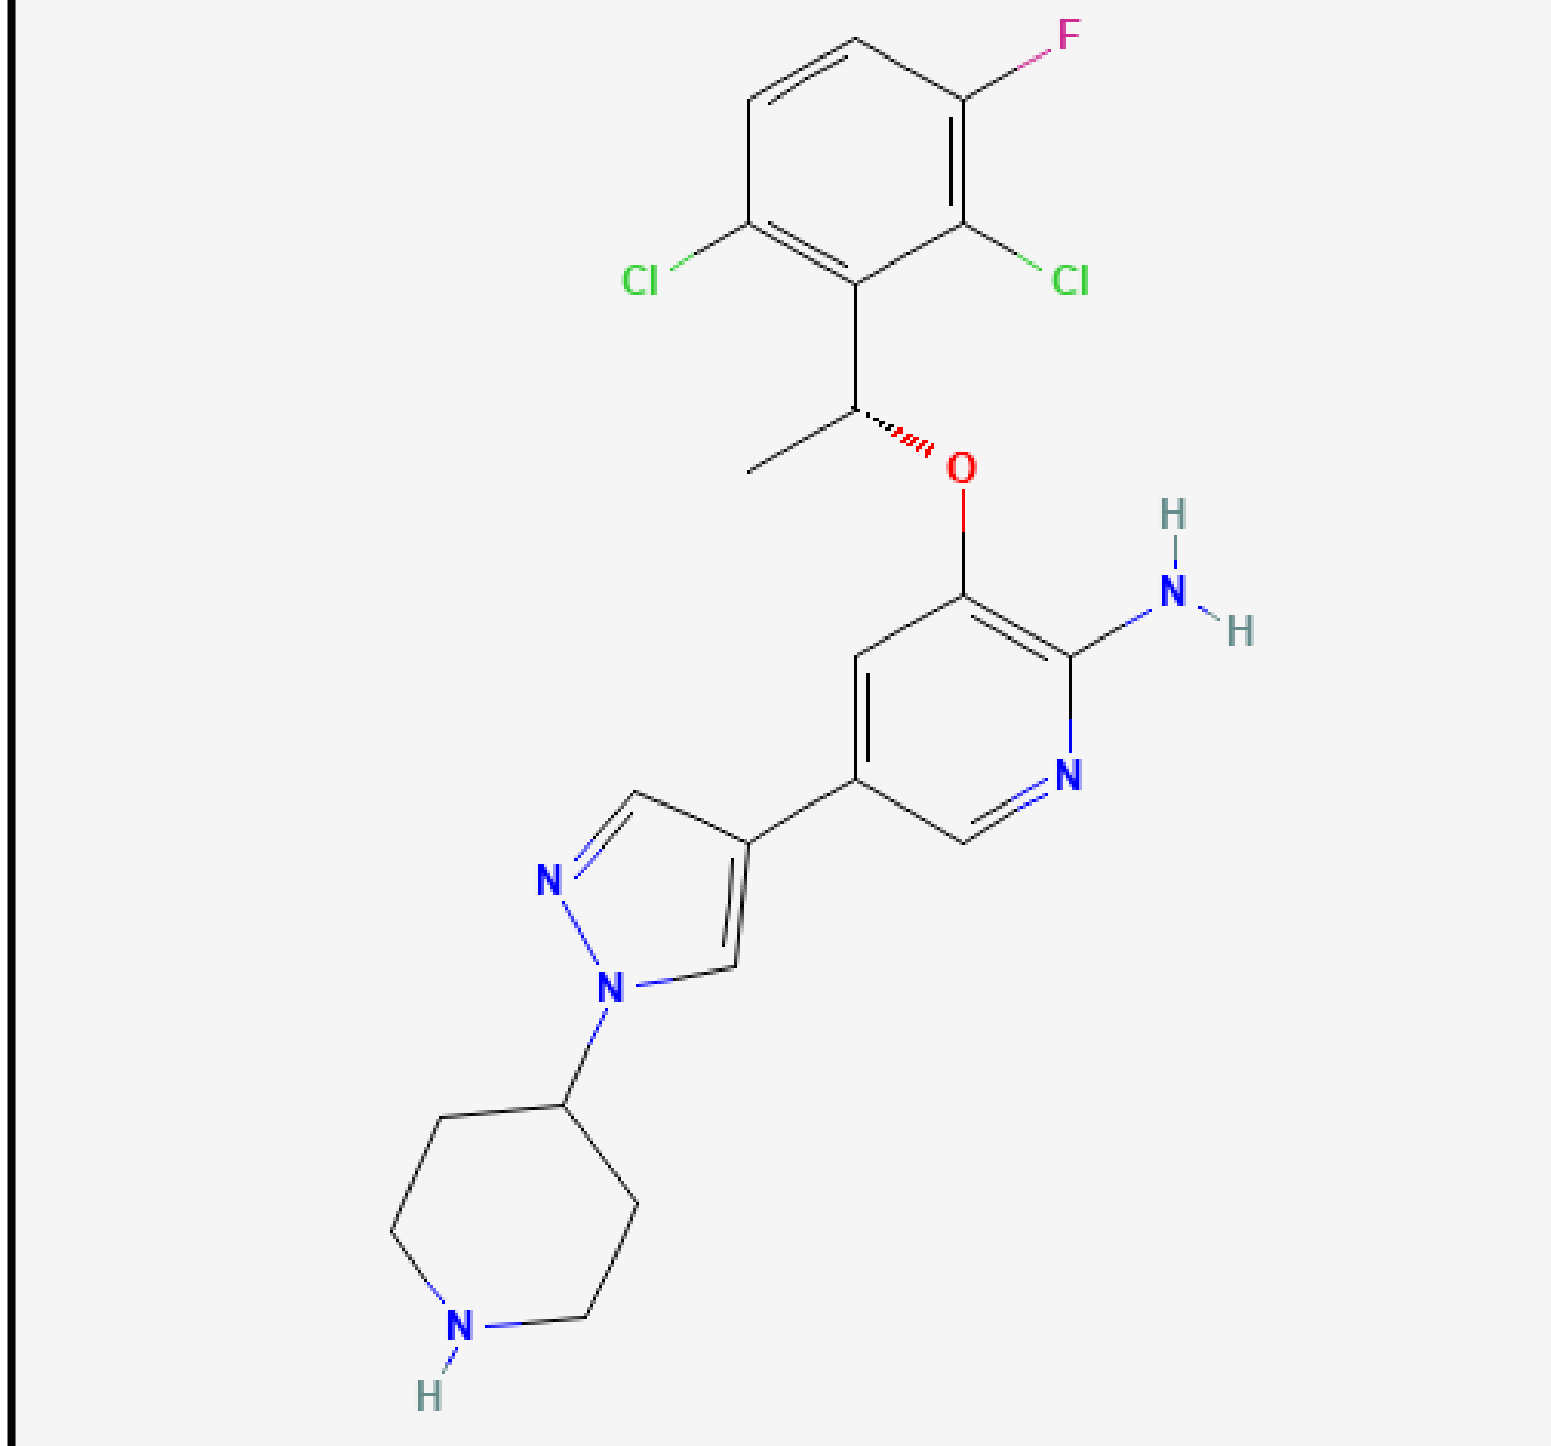

PubChem [Internet]. Bethesda (MD): National Library of Medicine (US), National Center for Biotechnology Information; 2004-. PubChem Compound Summary for CID 11626560, Crizotinib; [cited 2021 Oct. 12]. Available from: <https://pubchem.ncbi.nlm.nih.gov/compound/Crizotinib>

**Cabozantinib**

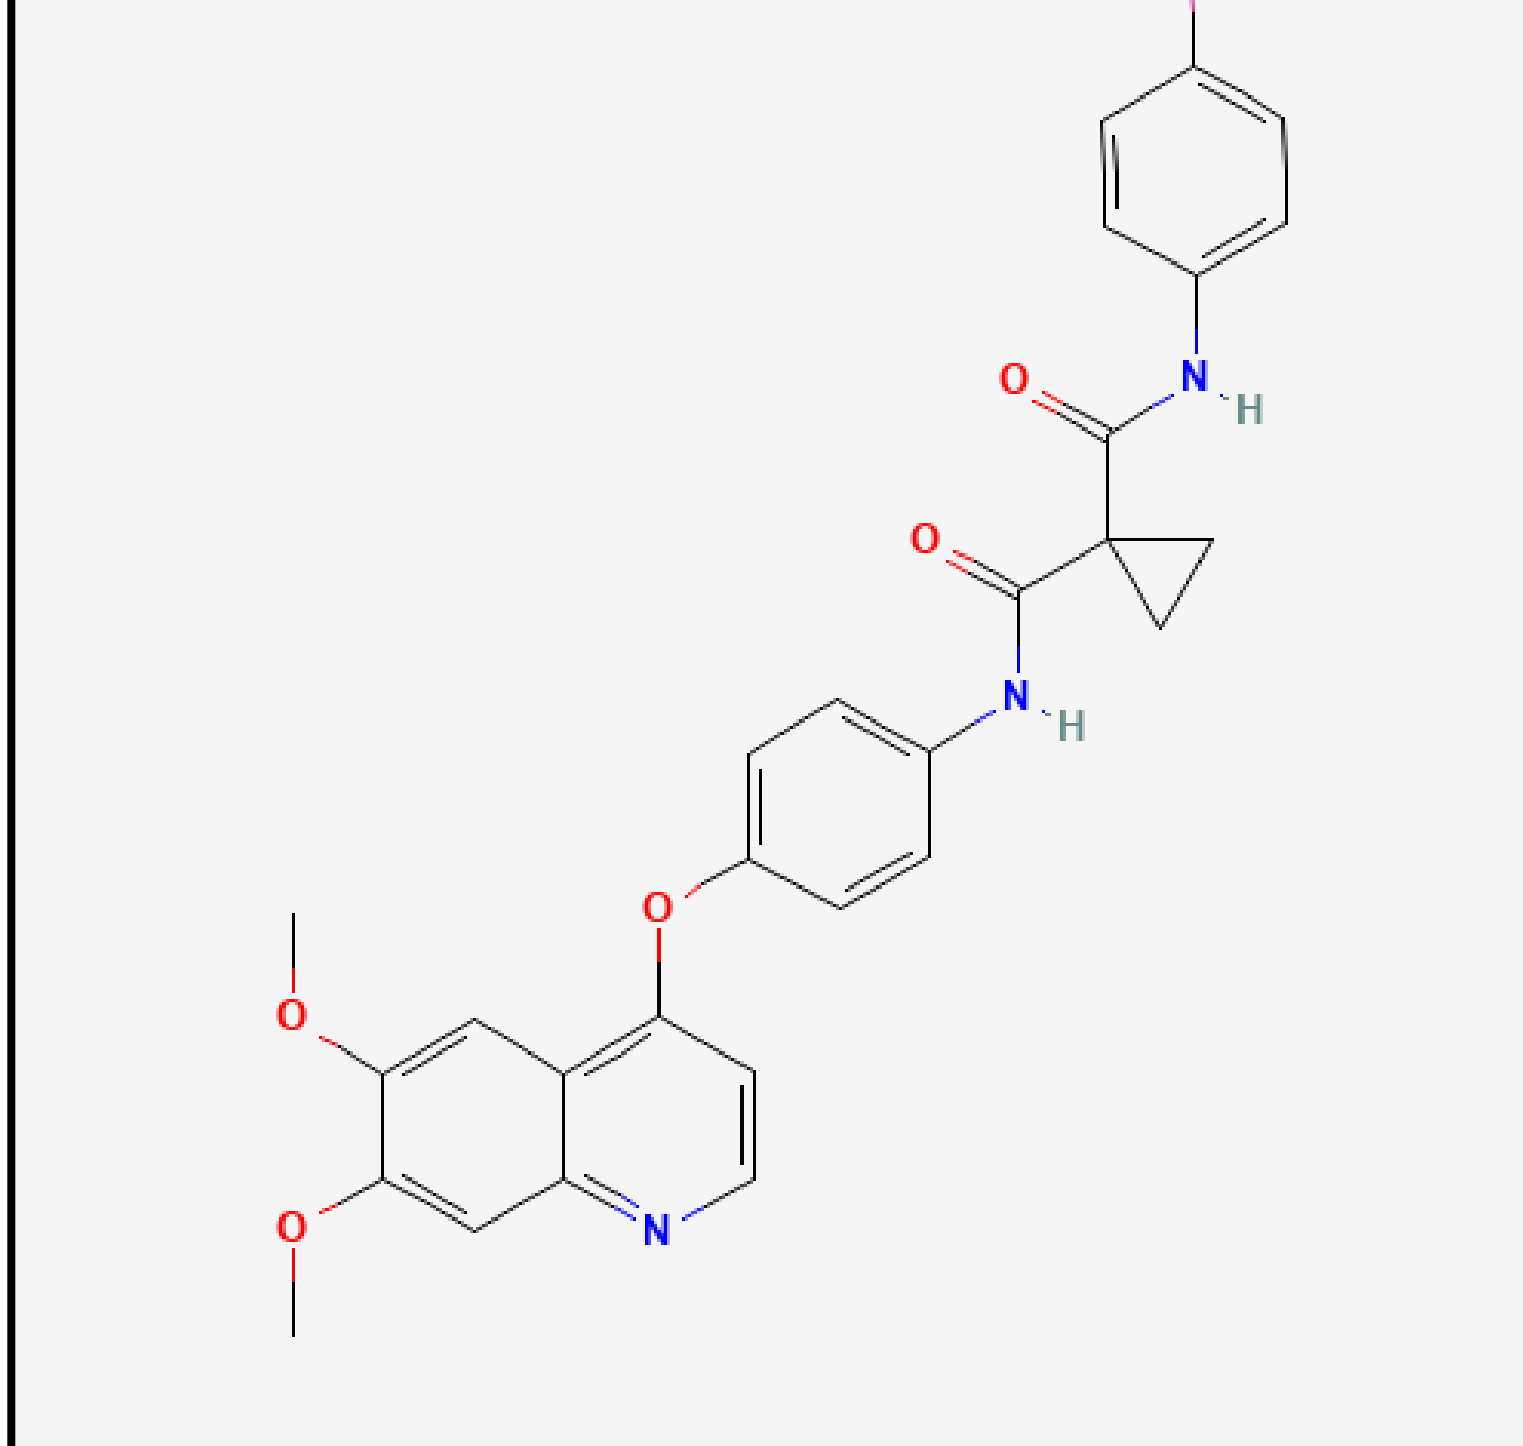

PubChem [Internet]. Bethesda (MD): National Library of Medicine (US), National Center for Biotechnology Information; 2004-. PubChem Compound Summary for CID 25102847, Cabozantinib; [cited 2021 Oct. 12]. Available from: <https://pubchem.ncbi.nlm.nih.gov/compound/Cabozantinib>

**Savolitinib**

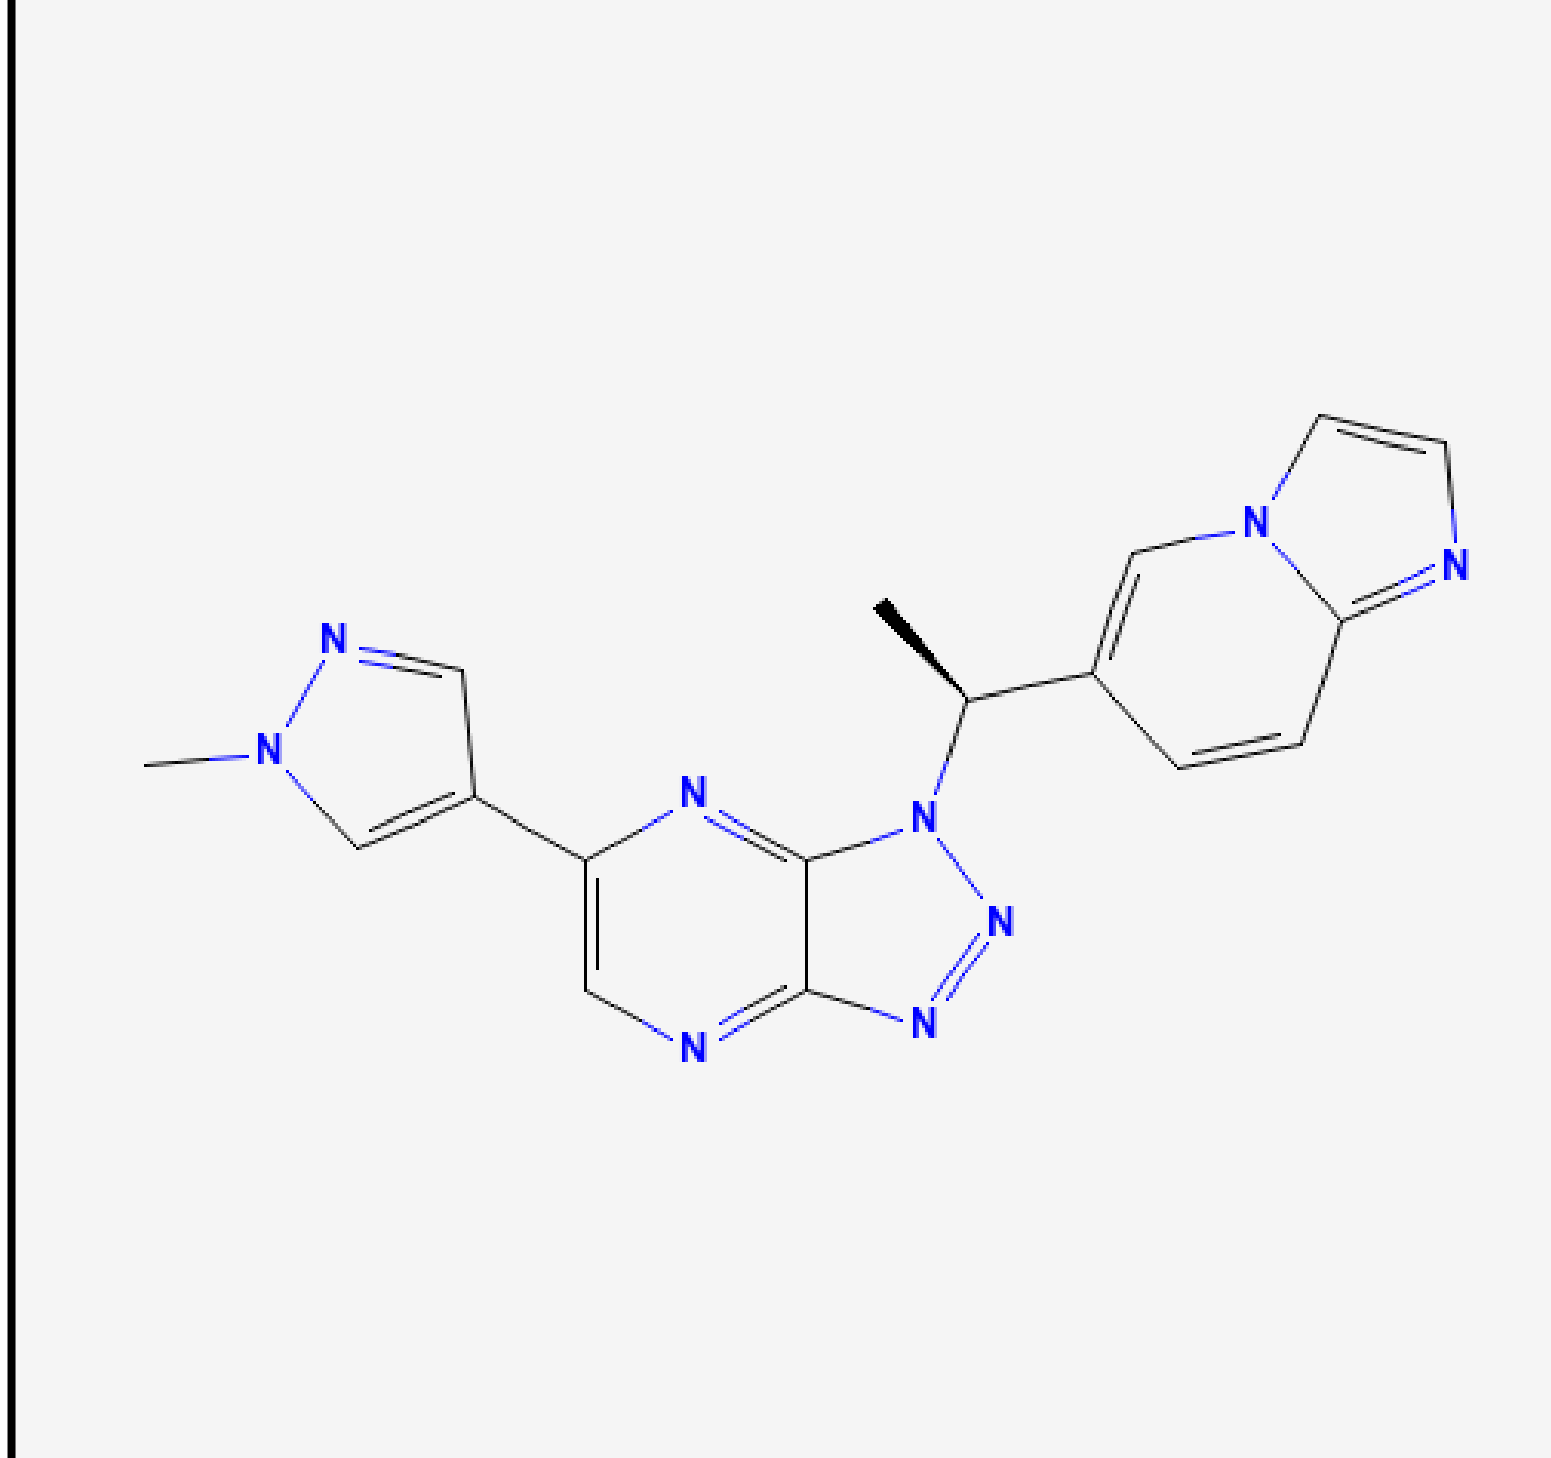

PubChem [Internet]. Bethesda (MD): National Library of Medicine (US), National Center for Biotechnology Information; 2004-. PubChem Compound Summary for CID 68289010, Savolitinib; [cited 2021 Oct. 12]. Available from: <https://pubchem.ncbi.nlm.nih.gov/compound/Savolitinib>

**Merestinib**

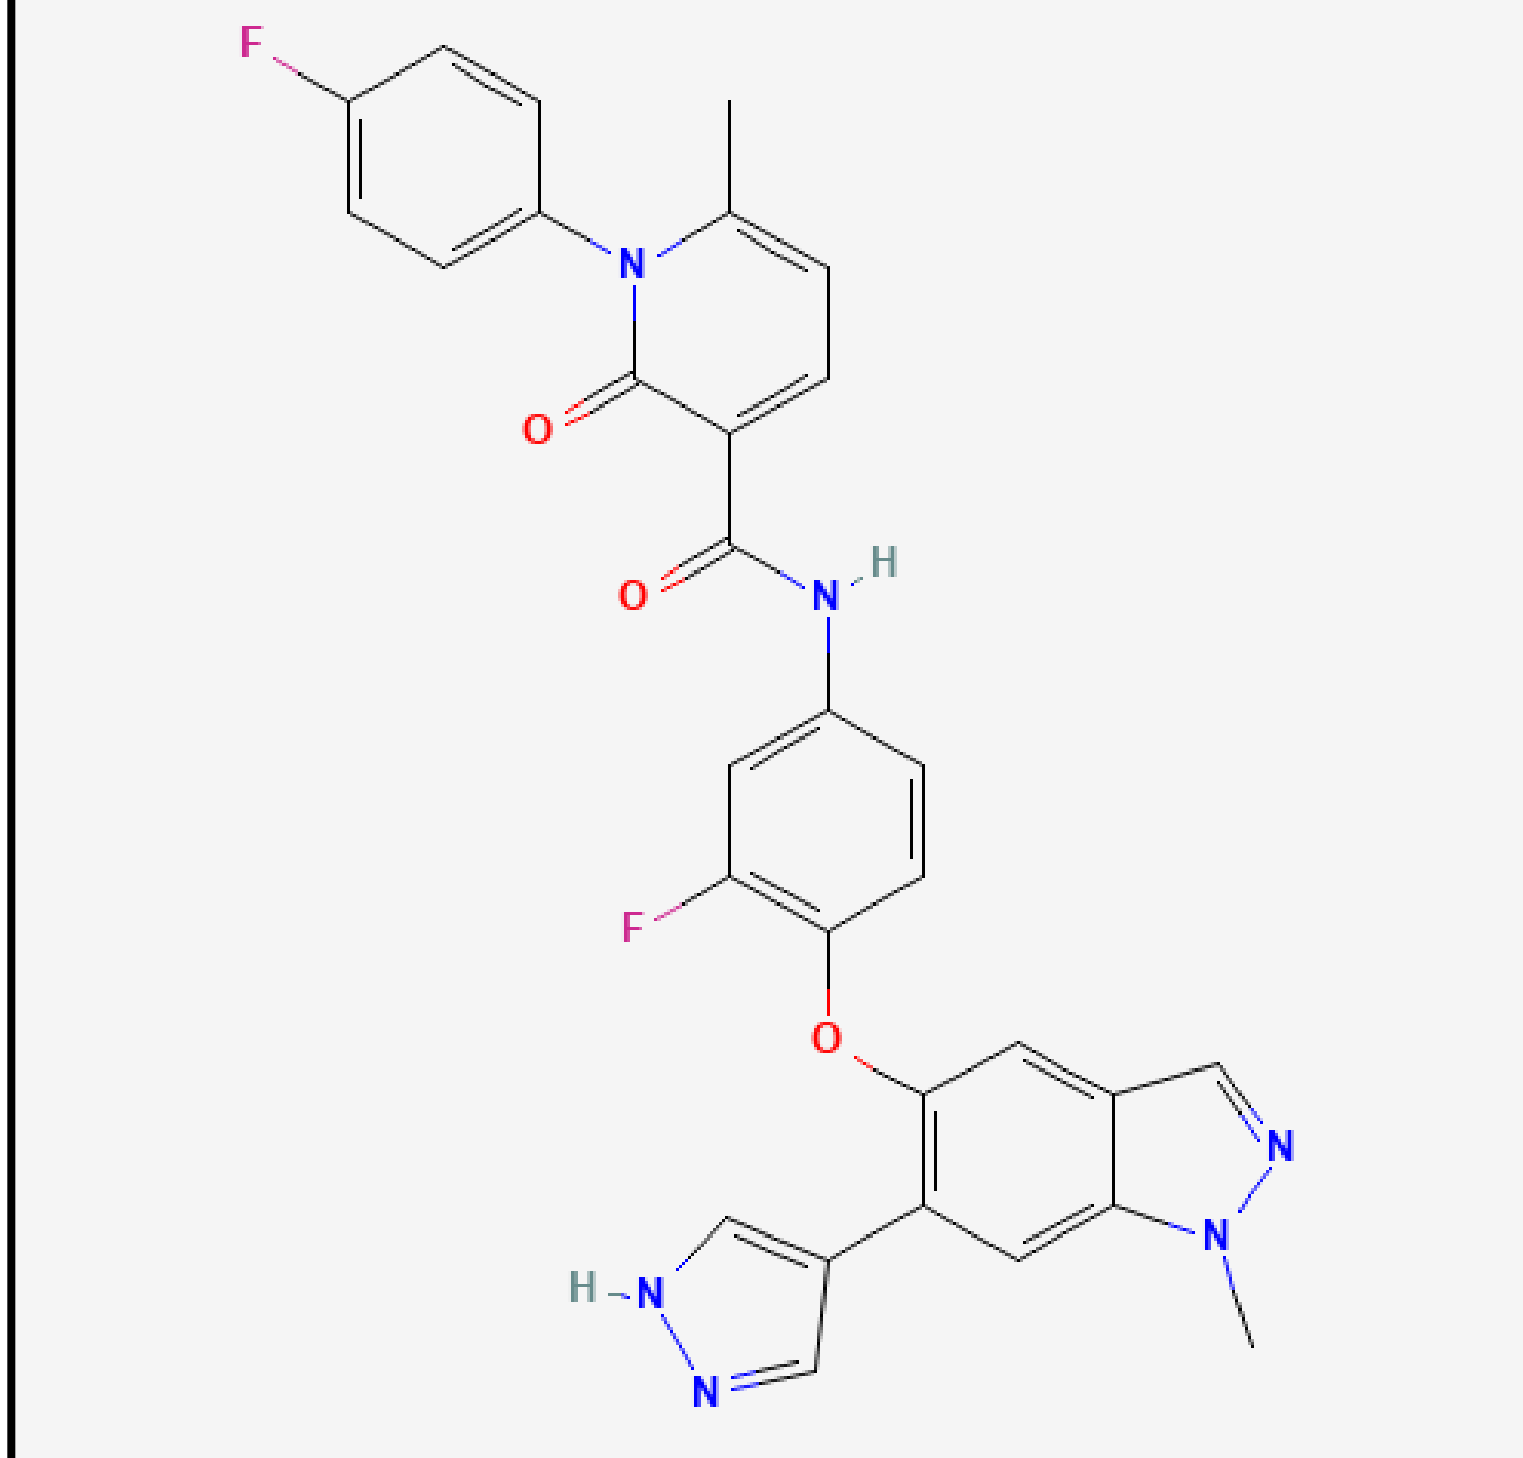

PubChem [Internet]. Bethesda (MD): National Library of Medicine (US), National Center for Biotechnology Information; 2004-. PubChem Compound Summary for CID 44603533, Merestinib; [cited 2021 Oct. 12]. Available from: <https://pubchem.ncbi.nlm.nih.gov/compound/Merestinib>

**Capmatinib**

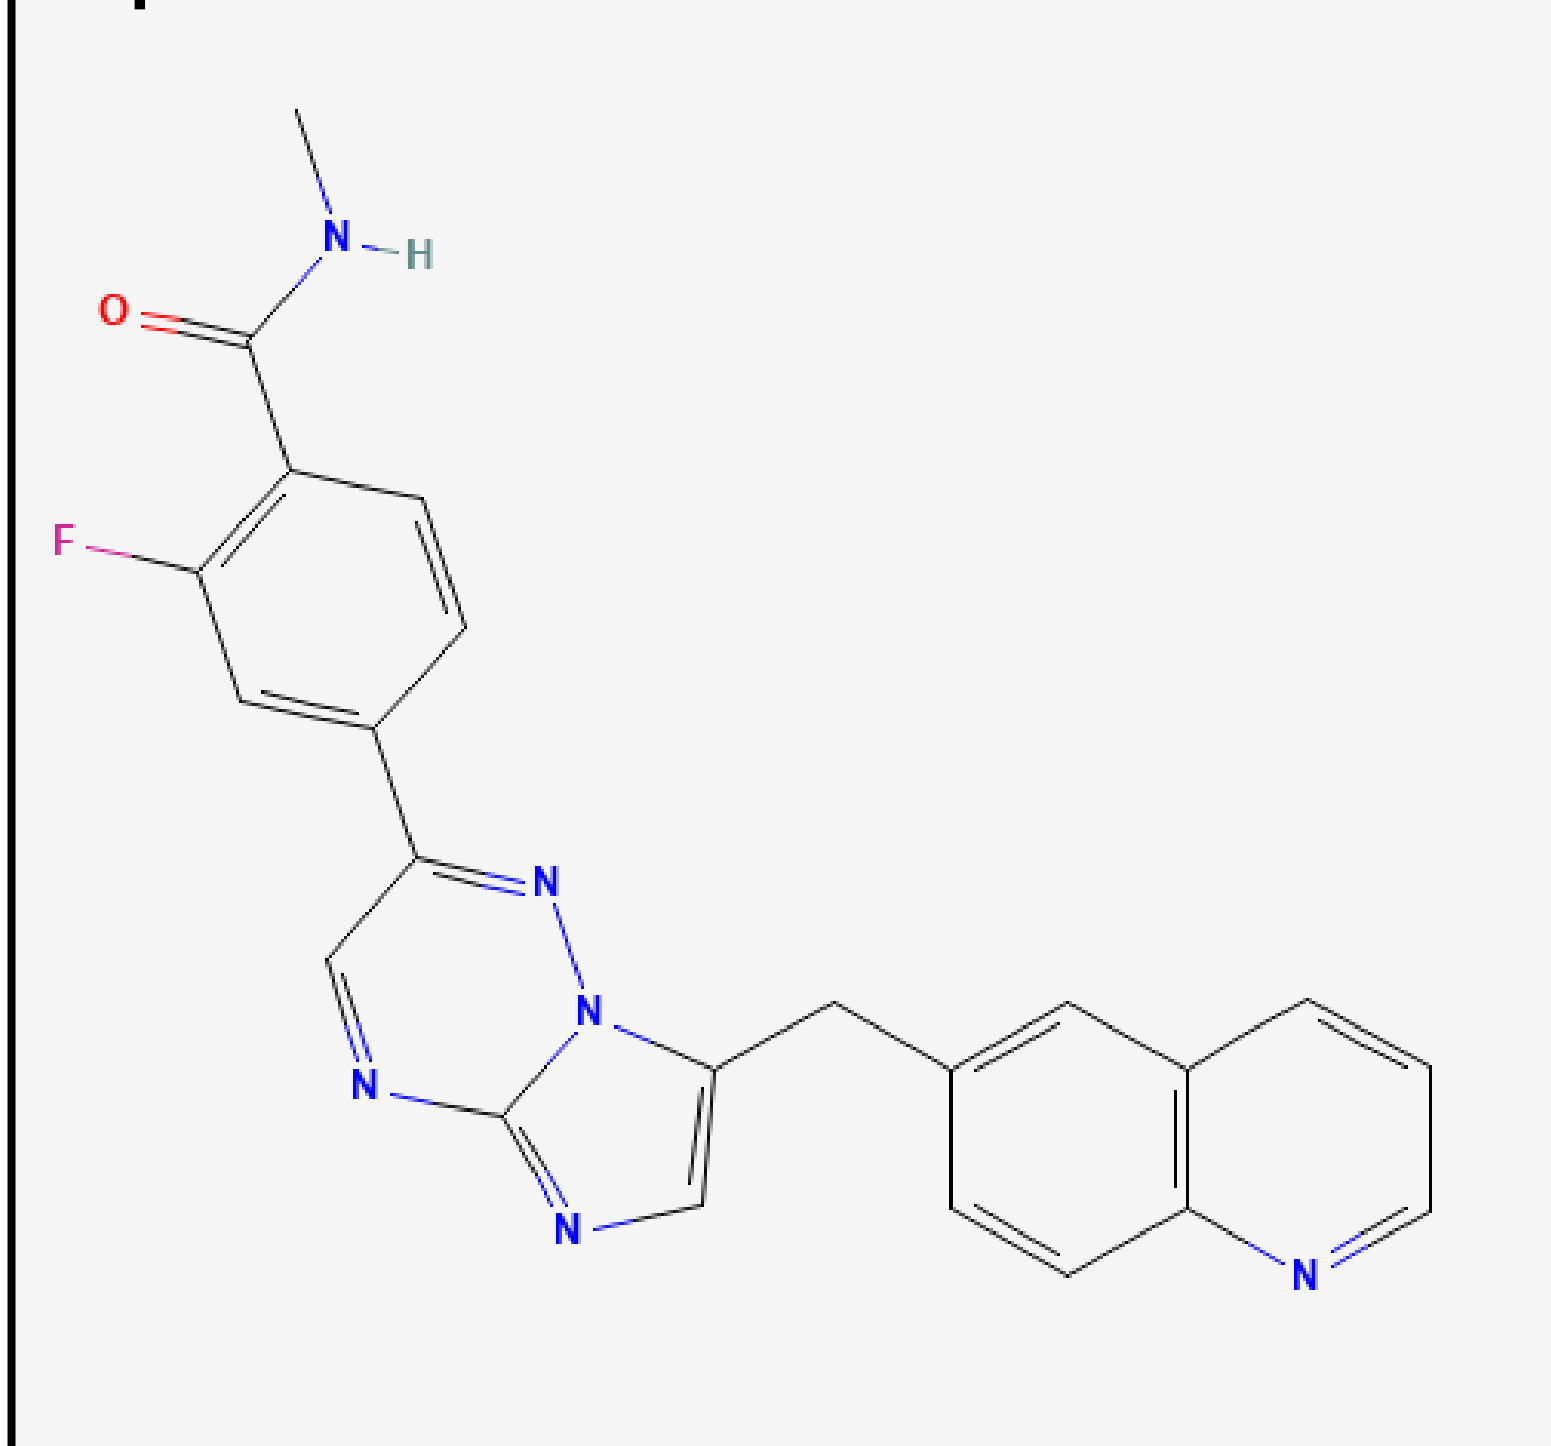

PubChem [Internet]. Bethesda (MD): National Library of Medicine (US), National Center for Biotechnology Information; 2004-. PubChem Compound Summary for CID 25145656, Capmatinib; [cited 2021 Oct. 12]. Available from: <https://pubchem.ncbi.nlm.nih.gov/compound/Capmatinib>

**Glesatinib**

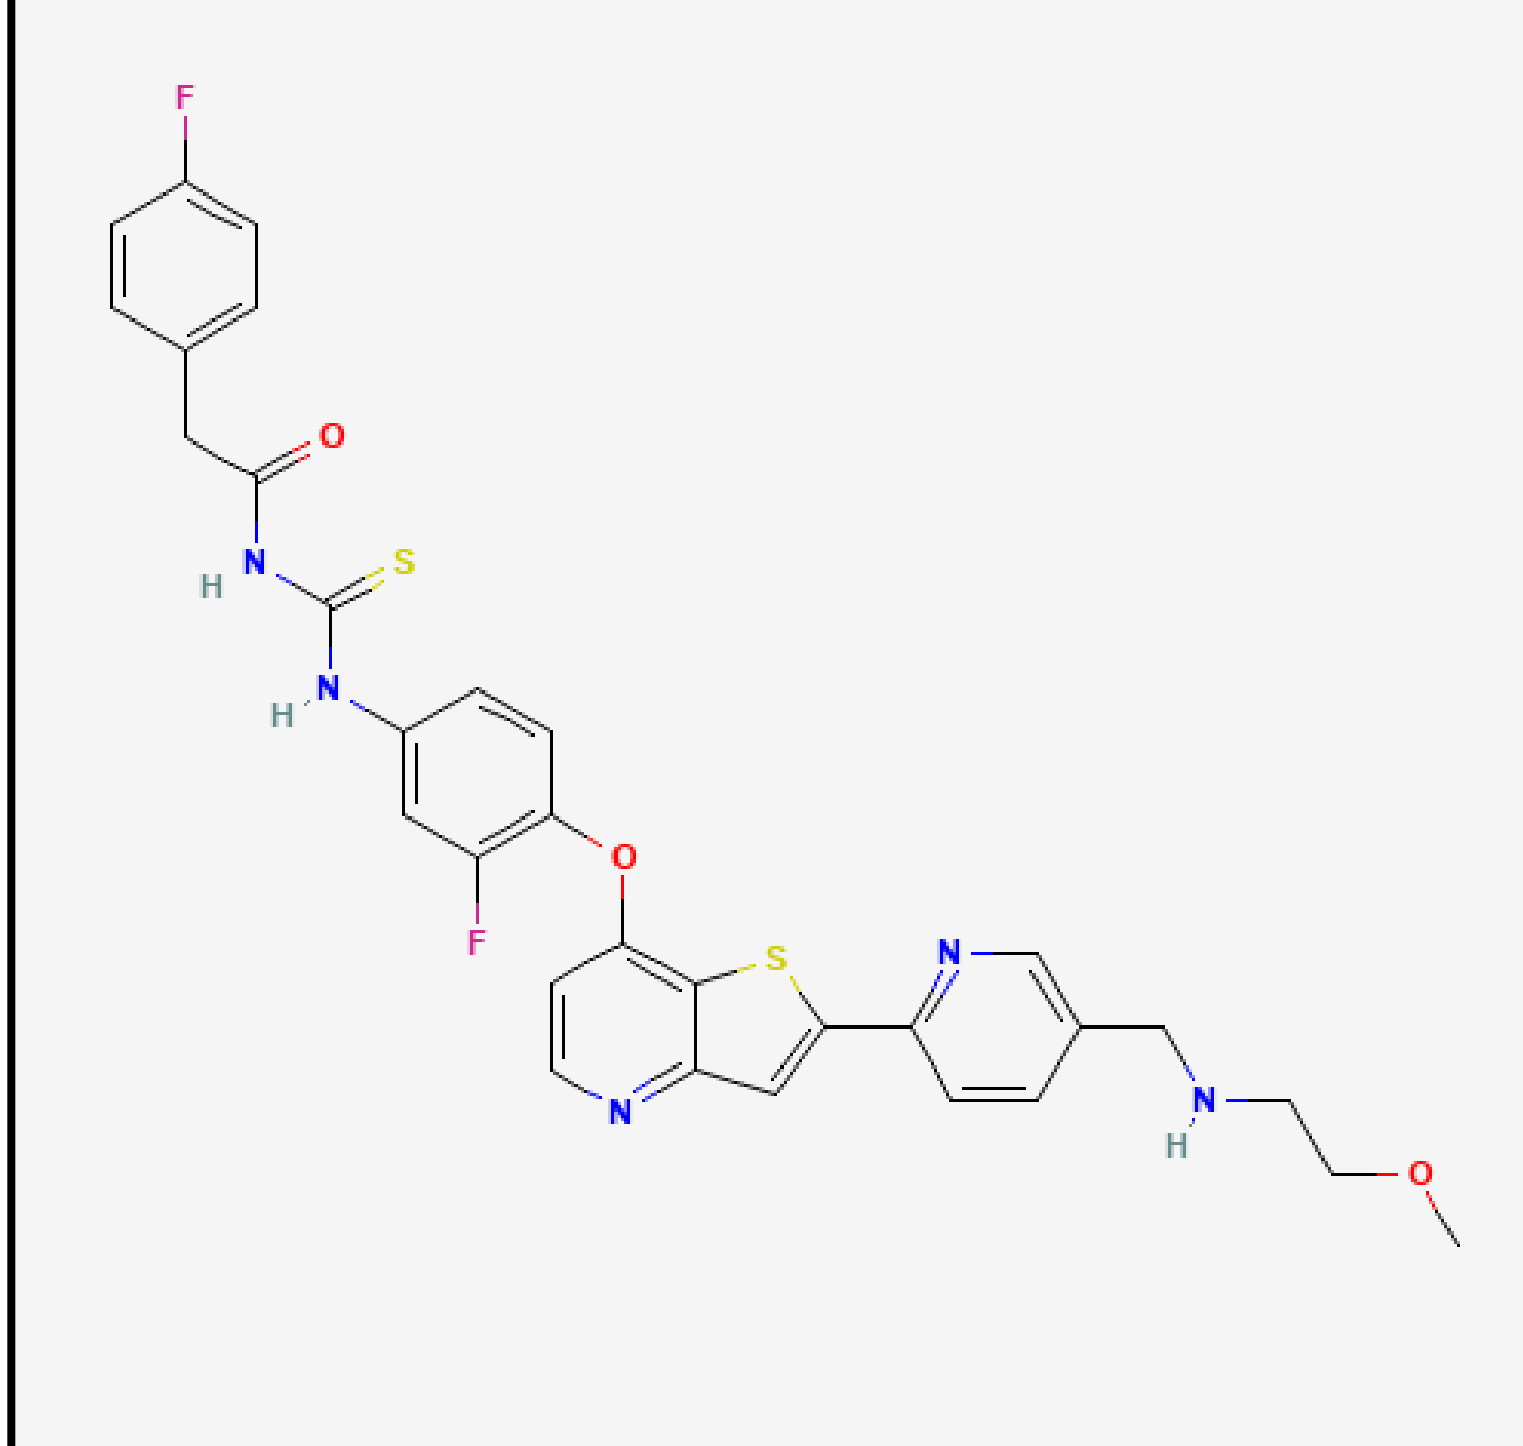

PubChem [Internet]. Bethesda (MD): National Library of Medicine (US), National Center for Biotechnology Information; 2004-. PubChem Compound Summary for CID 25181472, Glesatinib; [cited 2021 Oct. 12]. Available from: <https://pubchem.ncbi.nlm.nih.gov/compound/Glesatinib>

# Supplementary Table S2

| Assay             | Mutation/<br>Amplicon | Forward Primer                                               | Reverse Primer                                                                         | Probe                                                                           |
|-------------------|-----------------------|--------------------------------------------------------------|----------------------------------------------------------------------------------------|---------------------------------------------------------------------------------|
| Subcloning        | TPR-MET               | 5'-<br>GCATGATCTCGAGTATGGCGGCGGTGTTGCAG<br>CAAGTCCT-3'       | 5'-<br>GCATGATAAGCTTTCTTACTTGTGCATCGTCATCCTTGTA<br>TCTGATGTCTCCAGAAGGAGGCTGGTCGTGTG-3' |                                                                                 |
| Mutagenesis       | V1155L                | 5'-AAGGGTCTCCGCTGCTGGTCTACCATAC-3'                           | 5'-GTATGGTAGGACCAGCAGCGGAGACCCTT-3'                                                    |                                                                                 |
| Mutagenesis       | M1211L                | 5'-<br>GAGACTTGGCTGCAAGAACTGTCTGCTGGAT<br>GAAA-3'            | 5'-TTTCATCCAGCAGACAGTTTCTTGCAGCCAAGTCTC-3'                                             |                                                                                 |
| Mutagenesis       | Y1159N                | 5'-<br>CCGCTGGTGGTCCTACCAAACATGAAACATGG<br>AG-3'             | 5'-CTCCATGTTTCATGTTTGGTAGGACCACCAGCGG-3'                                               |                                                                                 |
| Mutagenesis       | Y1230H                | 5'-<br>TTTTGGTCTTGCCAGAGACATGCATGATAAAGA<br>ATACTATAGTGA-3'  | 5'-<br>TACACTATAGTATTCTTTATCATGCATGTCTCTGGCAAGA<br>CCAAA-3'                            |                                                                                 |
| Mutagenesis       | D1228N                | 5'-<br>GGTTGCTGATTTTGGTCTTGCCAGAAACATGTA<br>TGATAAAGAATAC-3' | 5'-<br>GTATTCTTTATCATAACATGTTTCTGGCAAGACCAAAATCA<br>GCAACC-3'                          |                                                                                 |
| Mutagenesis       | F1200I                | 5'-<br>ATATCTTGCAAGCAAAAAGATTGTCCACAGAGA<br>CTTGGC-3'        | 5'-<br>GCCAAGTCTCTGTGGACAATCTTTTGGCTTGCAAGATAT-<br>3'                                  |                                                                                 |
| Mutagenesis       | L1195V                | 5'-<br>CTTCAAGTAGCCAAAGGCATGAAATATGTTGCA<br>AGCAAAAAGTT-3'   | 5'-<br>AACTTTTGGCTTGCAACATATTTTCATGCCTTTGGCTACTT<br>GAAG-3'                            |                                                                                 |
| Mutagenesis       | G1163R                | 5'-<br>TGGTGGTCTACCATACATGAAACATAGAGATC<br>TTCGAAAT-3'       | 5'-<br>ATTTGCAAGATCTCTATGTTTCATGTATGGTAGGACCAC<br>CA-3'                                |                                                                                 |
| PCR amplification | MET TKD               | 5'-TCTCAGAACGGTTCATGCCG-3'                                   | 5'-CCGTCATGGTCTTTGTAGTCTG-3'                                                           |                                                                                 |
| Sanger sequencing | MET TKD               | 5'-TGCAGCATGTAGTGATTGGGC-3'                                  | 5'-ACGGAGCGACACATTTTACG-3'                                                             |                                                                                 |
| ddPCR             | Y1230H                | 5'- CAGTCAAGGTTGCTGATTTTGGT-3'                               | 5'-TGCACCTGTTTTGTTGTGTACTACTA-3'                                                       | 5'-VIC-TGCCAGAGACATGTATGATA-MGB-NFQ-3'<br>5'-FAM- CCAGAGACATGCATGATA-MGB-NFQ-3' |
| ddPCR             | D1228N                | 5'- CAGTCAAGGTTGCTGATTTTGGT-3'                               | 5'- TGCACCTGTTTTGTTGTGTACTACTA-3'                                                      | 5'-VIC- CTTGCCAGAGACATGT-MGB-NFQ-3'<br>5'-FAM- CTTGCCAGAAACATGT-MGB-NFQ-3'      |
| ddPCR             | F1200I                | 5'- GATCTTATTGGCTTTGGTC-3'                                   | 5'- ACAGTTTCTTGCAGCCAAGT-3'                                                            | 5'-VIC- TGTGGACAACTTTTT-MGB-NFQ-3'<br>5'-FAM- TGTGGACAATCTTTTT-MGB-NFQ-3'       |
| ddPCR             | L1195V                | 5'- AGATCTTATTGGCTTTGGTCTTCAAGTAG-3'                         | 5'- GCCAAGTCTCTGTGGACAACT-3'                                                           | 5'-VIC- TTGCTTGCAAGATATTT-MGB-NFQ-3'<br>5'-FAM- TGCTTGCAACATATTT-MGB-NFQ-3'     |
| ddPCR             | G1163R                | 5'- TCTCCGCTGGTGGTCCTA-3'                                    | 5'- ATGAGTCTCATTTGCAATGAAATTTGCA-3'                                                    | 5'-VIC- CATGAAACATGGAGATCT-MGB-NFQ-3'<br>5'-FAM- CATGAAACATAGAGATCT-MGB-NFQ-3'  |

**Supplementary Table S2.** Primers and probes used in the study

## Supplementary Table S3

|                                         | <b>N</b>   | <b>%</b> |
|-----------------------------------------|------------|----------|
| <b>Total sequenced</b>                  | <b>153</b> |          |
| Detected by both Sanger and ddPCR       | 145        | 95       |
| Detected by ddPCR, not by Sanger        | 4          | 3        |
| Detected by Sanger, not by ddPCR        | 5          | 3        |
| Probe detects multiple aa substitutions | 11         | 7        |
| L1195V probe detecting L1195F           | 2/5        | 40       |
| Y1230H probe detecting Y1230C           | 2/3        | 67       |
| F1200I probe detecting F1200L/V         | 7/8        | 88       |

**Supplementary Table S3.** Comparison of Sanger and ddPCR sequencing as sequencing tools to detect MET secondary mutations.

# Supplementary Figure S2

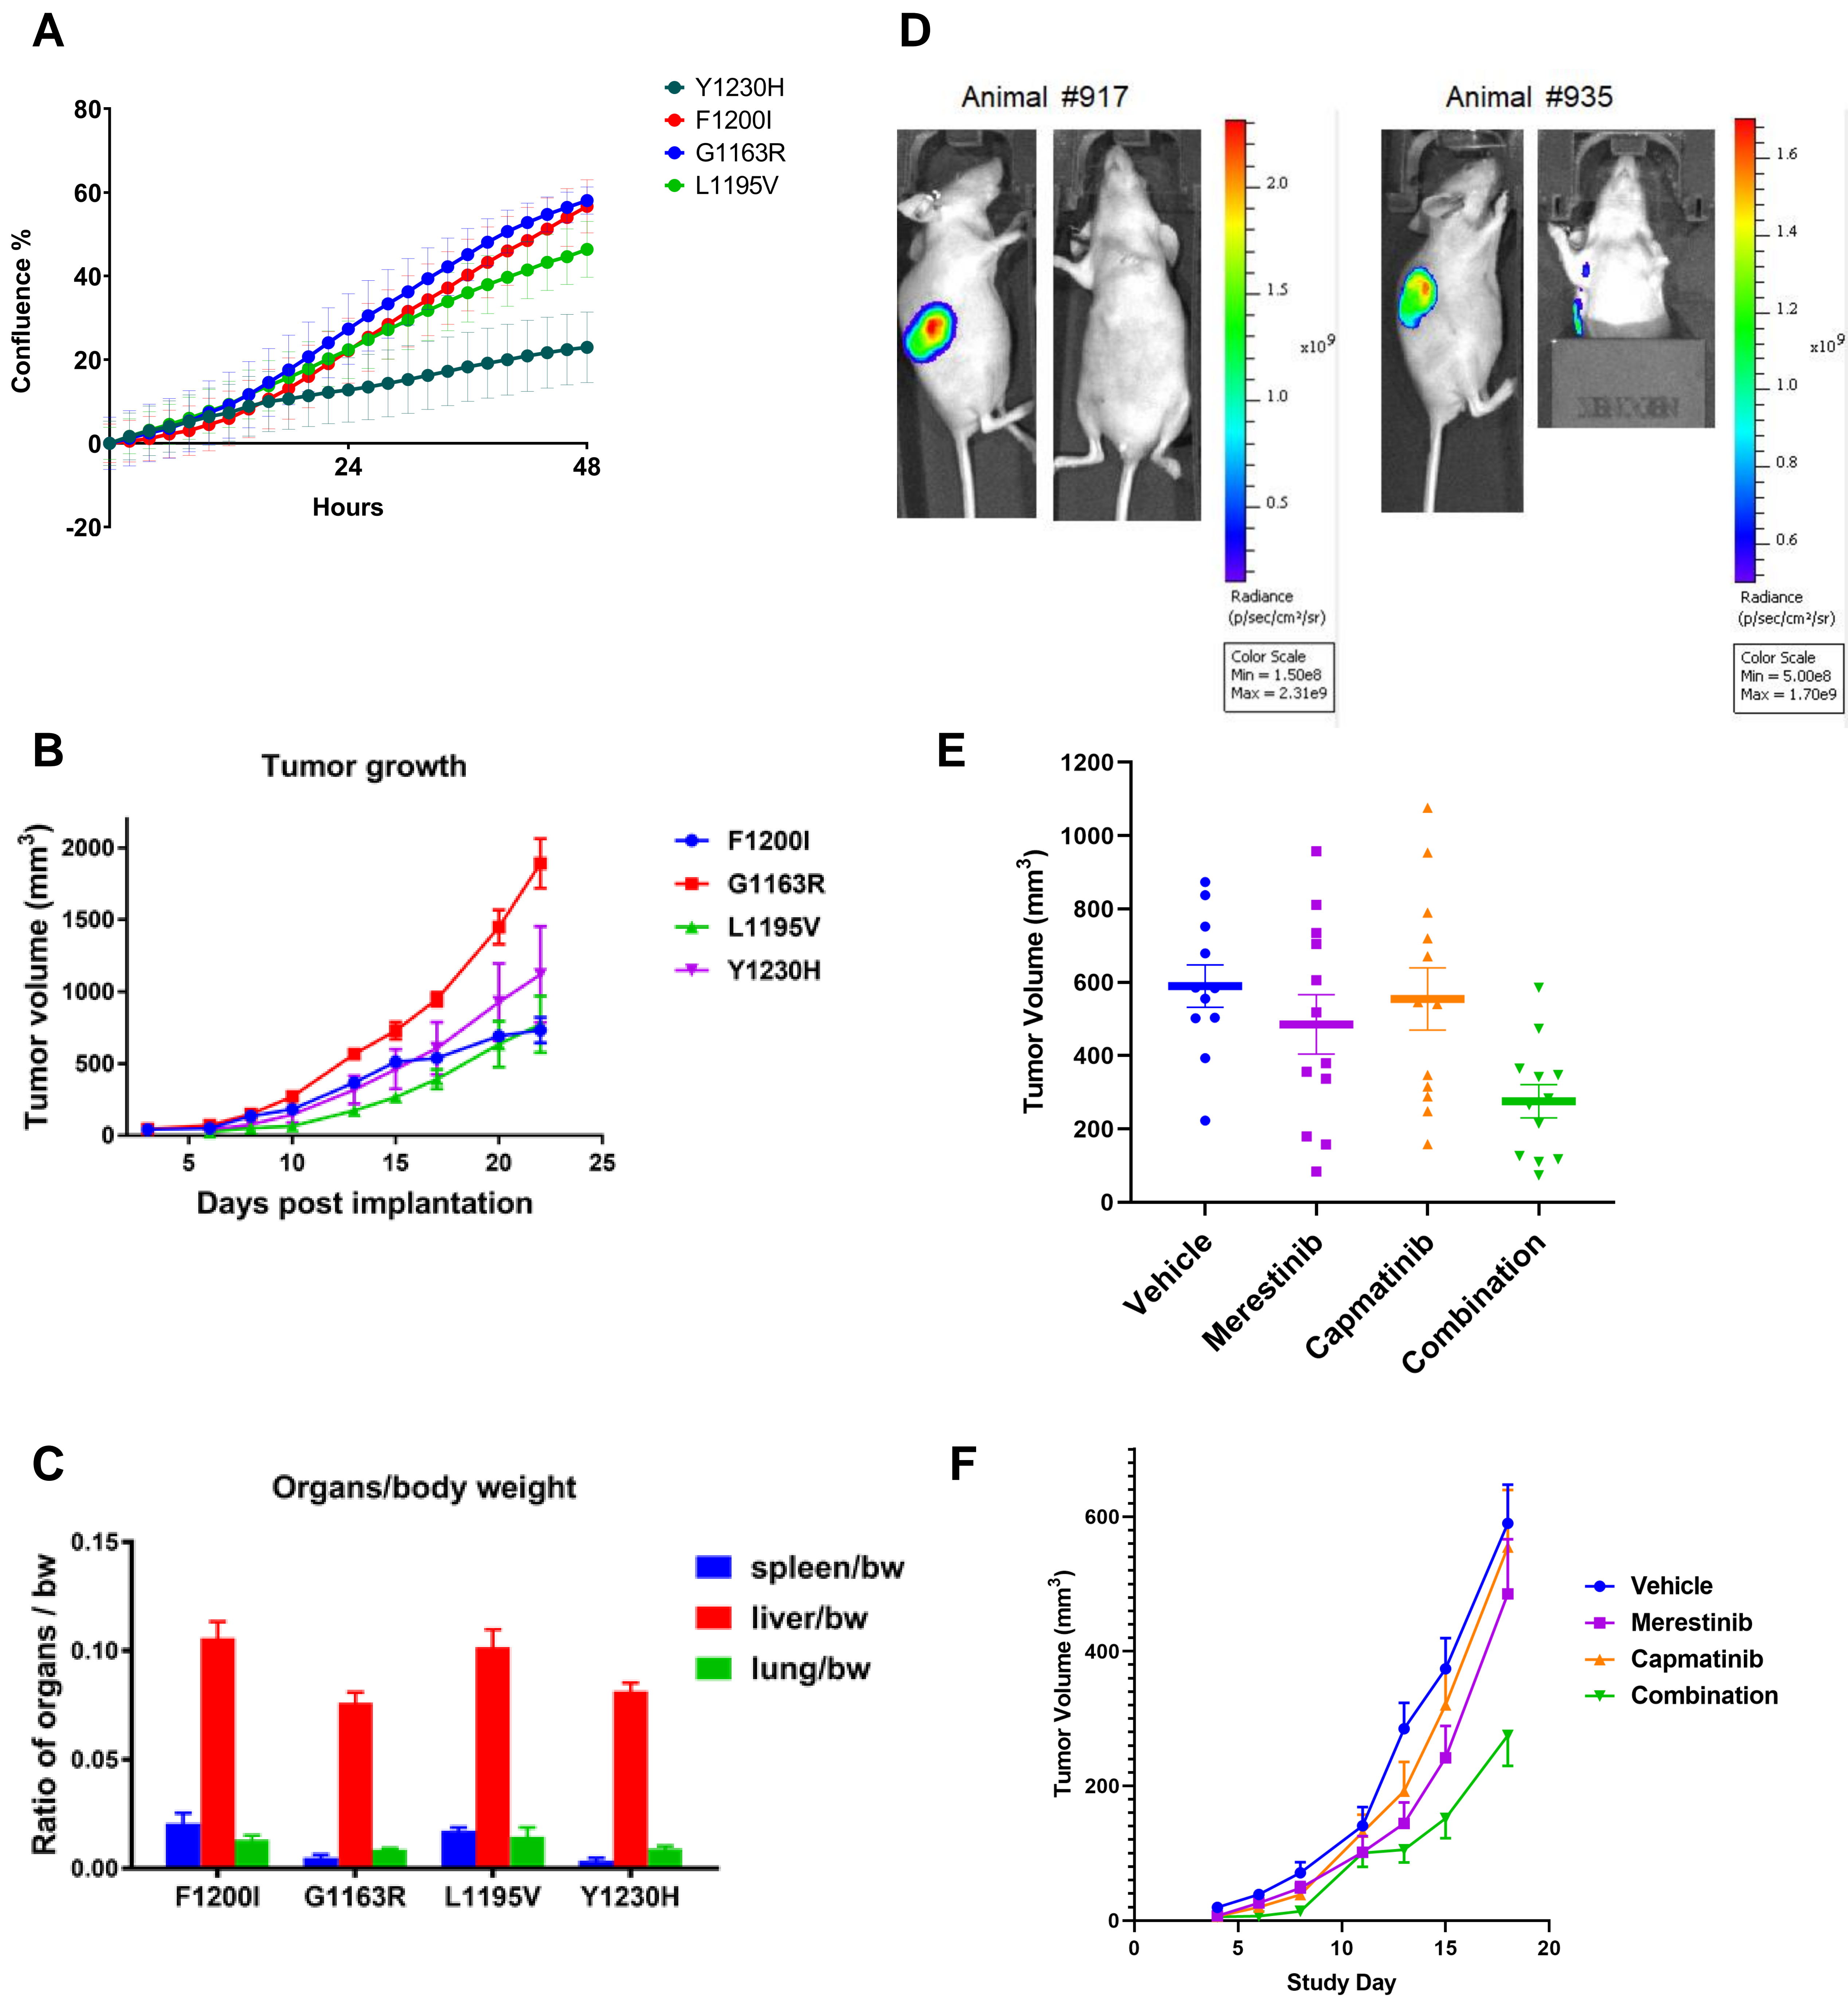

## Supplementary Figure S2.

Extension of *in vivo* study data. **A**, Incucyte-based comparison of proliferation rates of TPR-MET mutant Ba/F3 cell lines. **B**, Comparison of *in vivo* growth rates of individually implanted TPR-MET mutant Ba/F3 xenografts. **C**, Surrogate for metastasis assessment – ratio of organ to body weight harvested from mice implanted with TPR-MET mutant Ba/F3 cell lines. **D**, Representative bioluminescence images of luciferized TPR-MET L1195V mutant Ba/F3 cell xenografts on day 17 of vehicle treatment showing no metastases. **E**, Column scatter plot (line = mean) of the tumor volume distribution for each treatment arm, **F**, Plot of tumor volume measurements as a function of time in days.

# Supplementary Figure S3

A

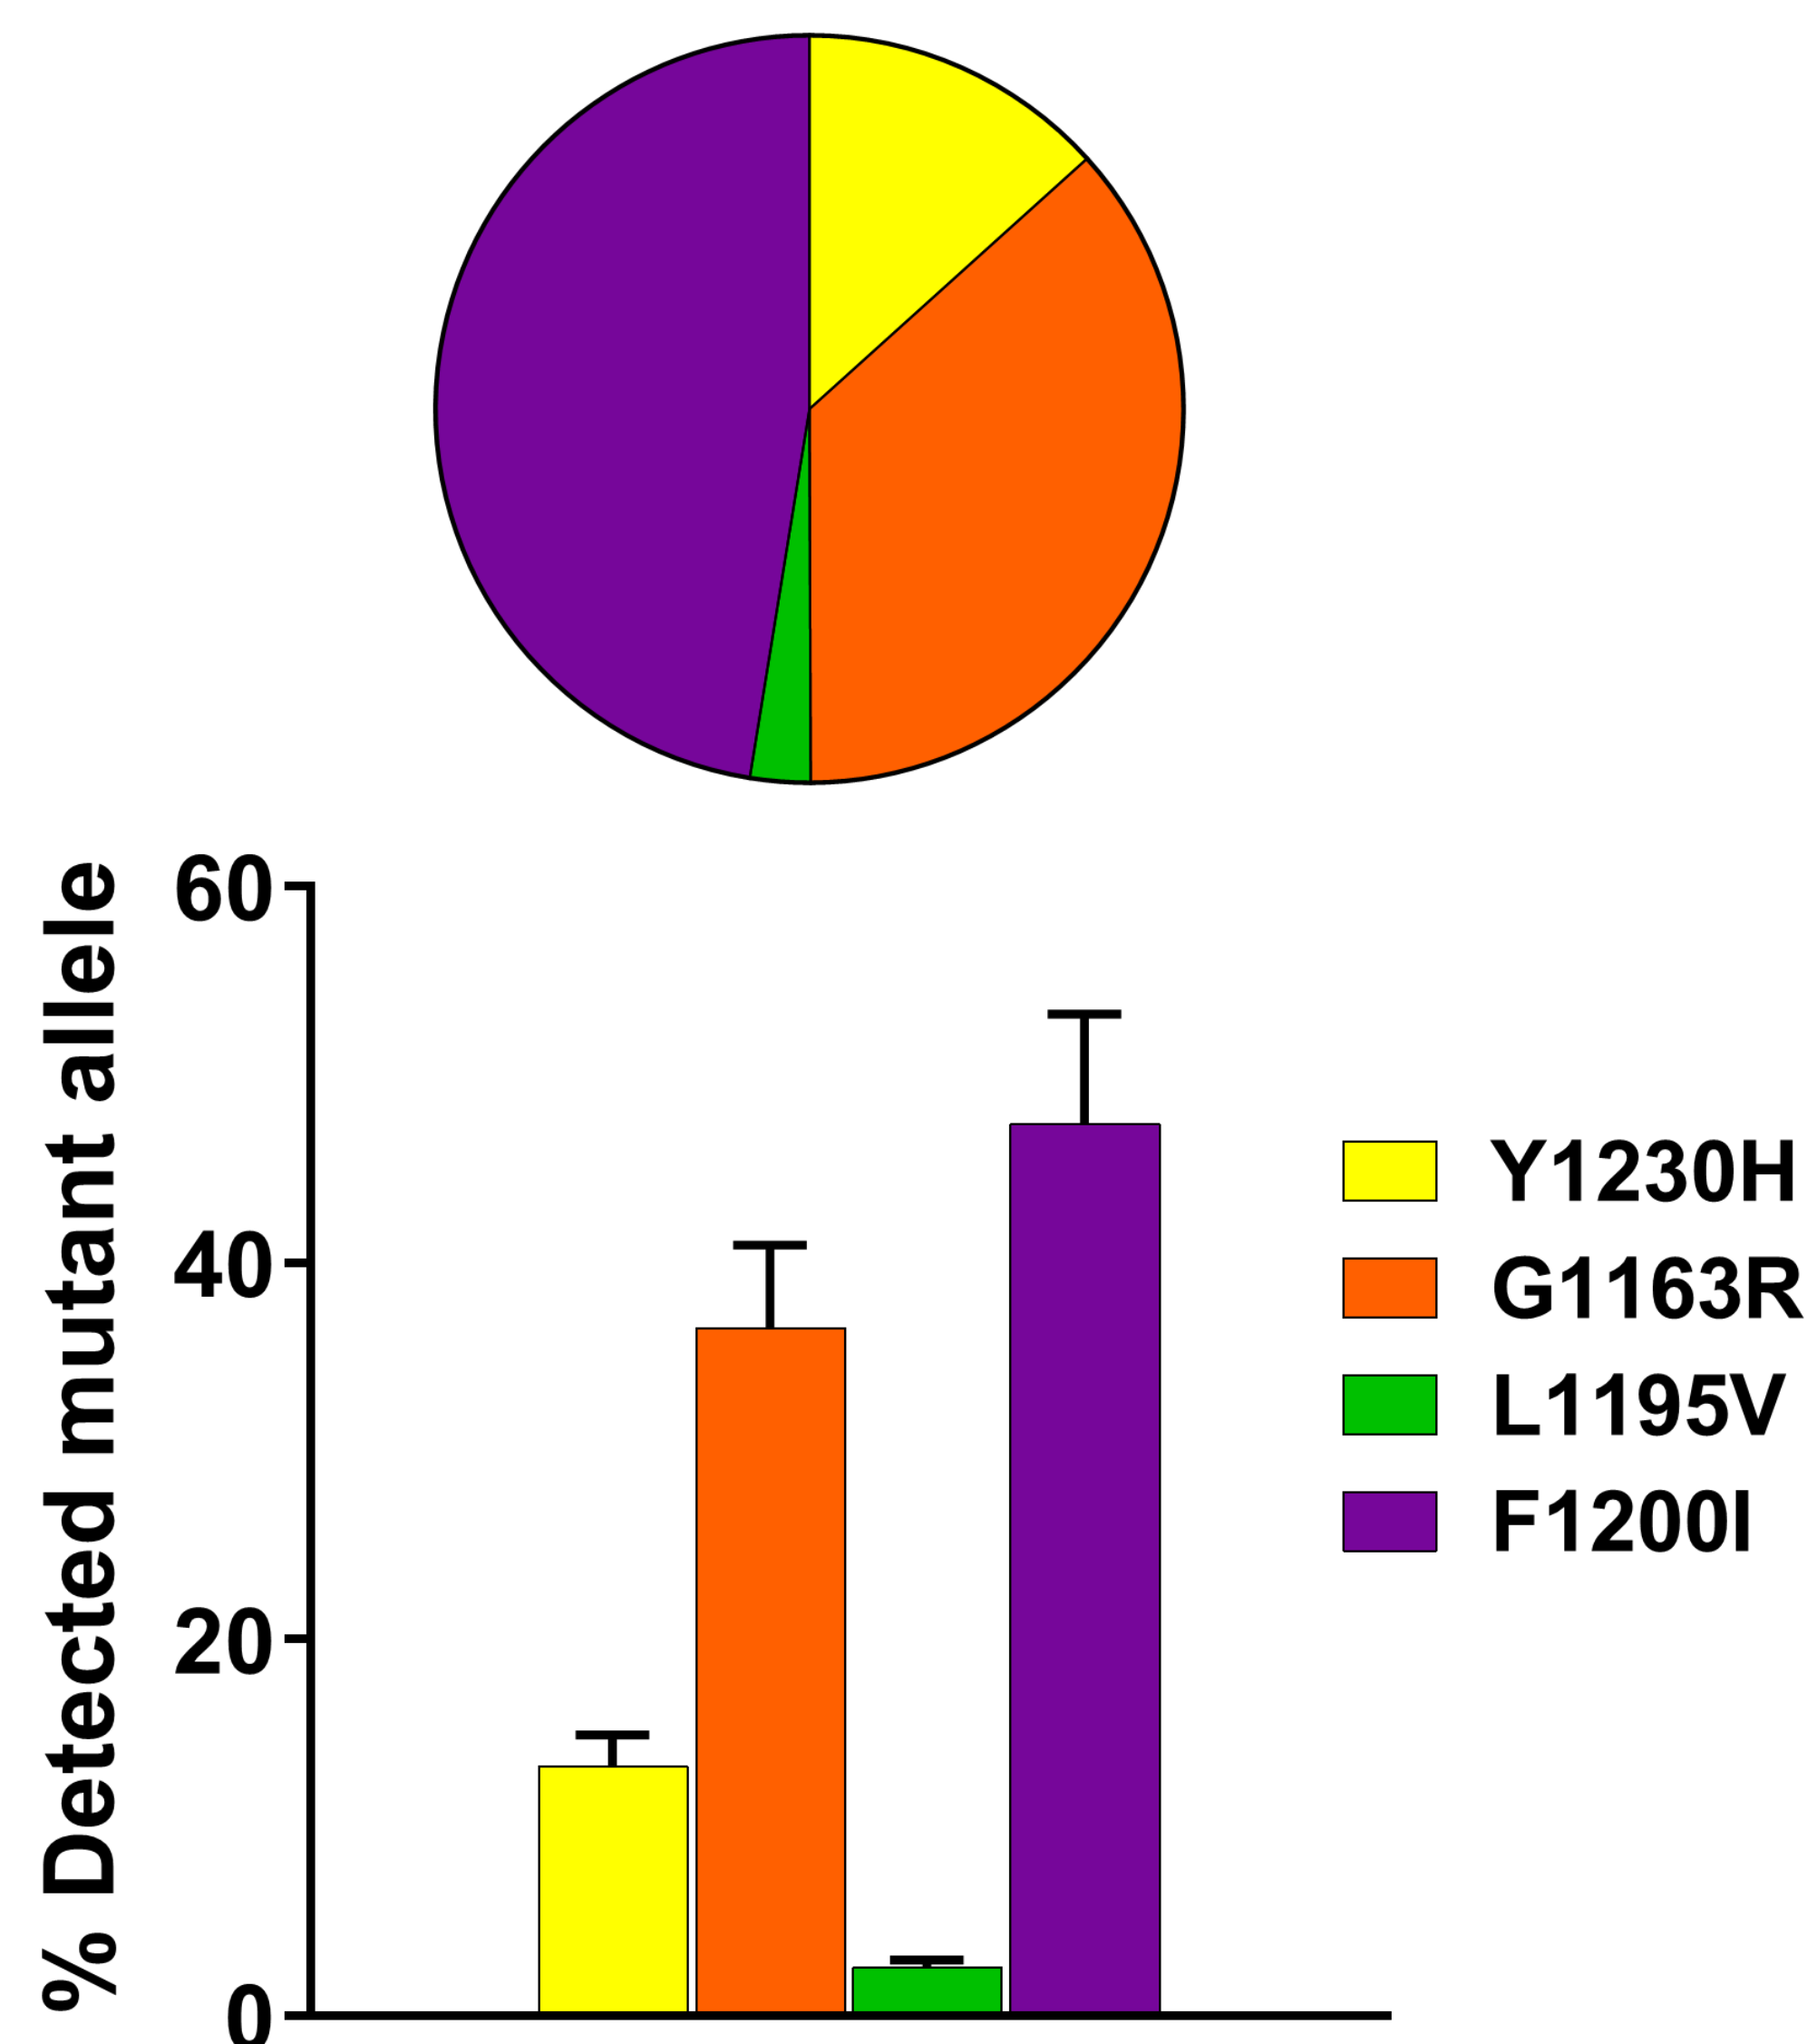

B

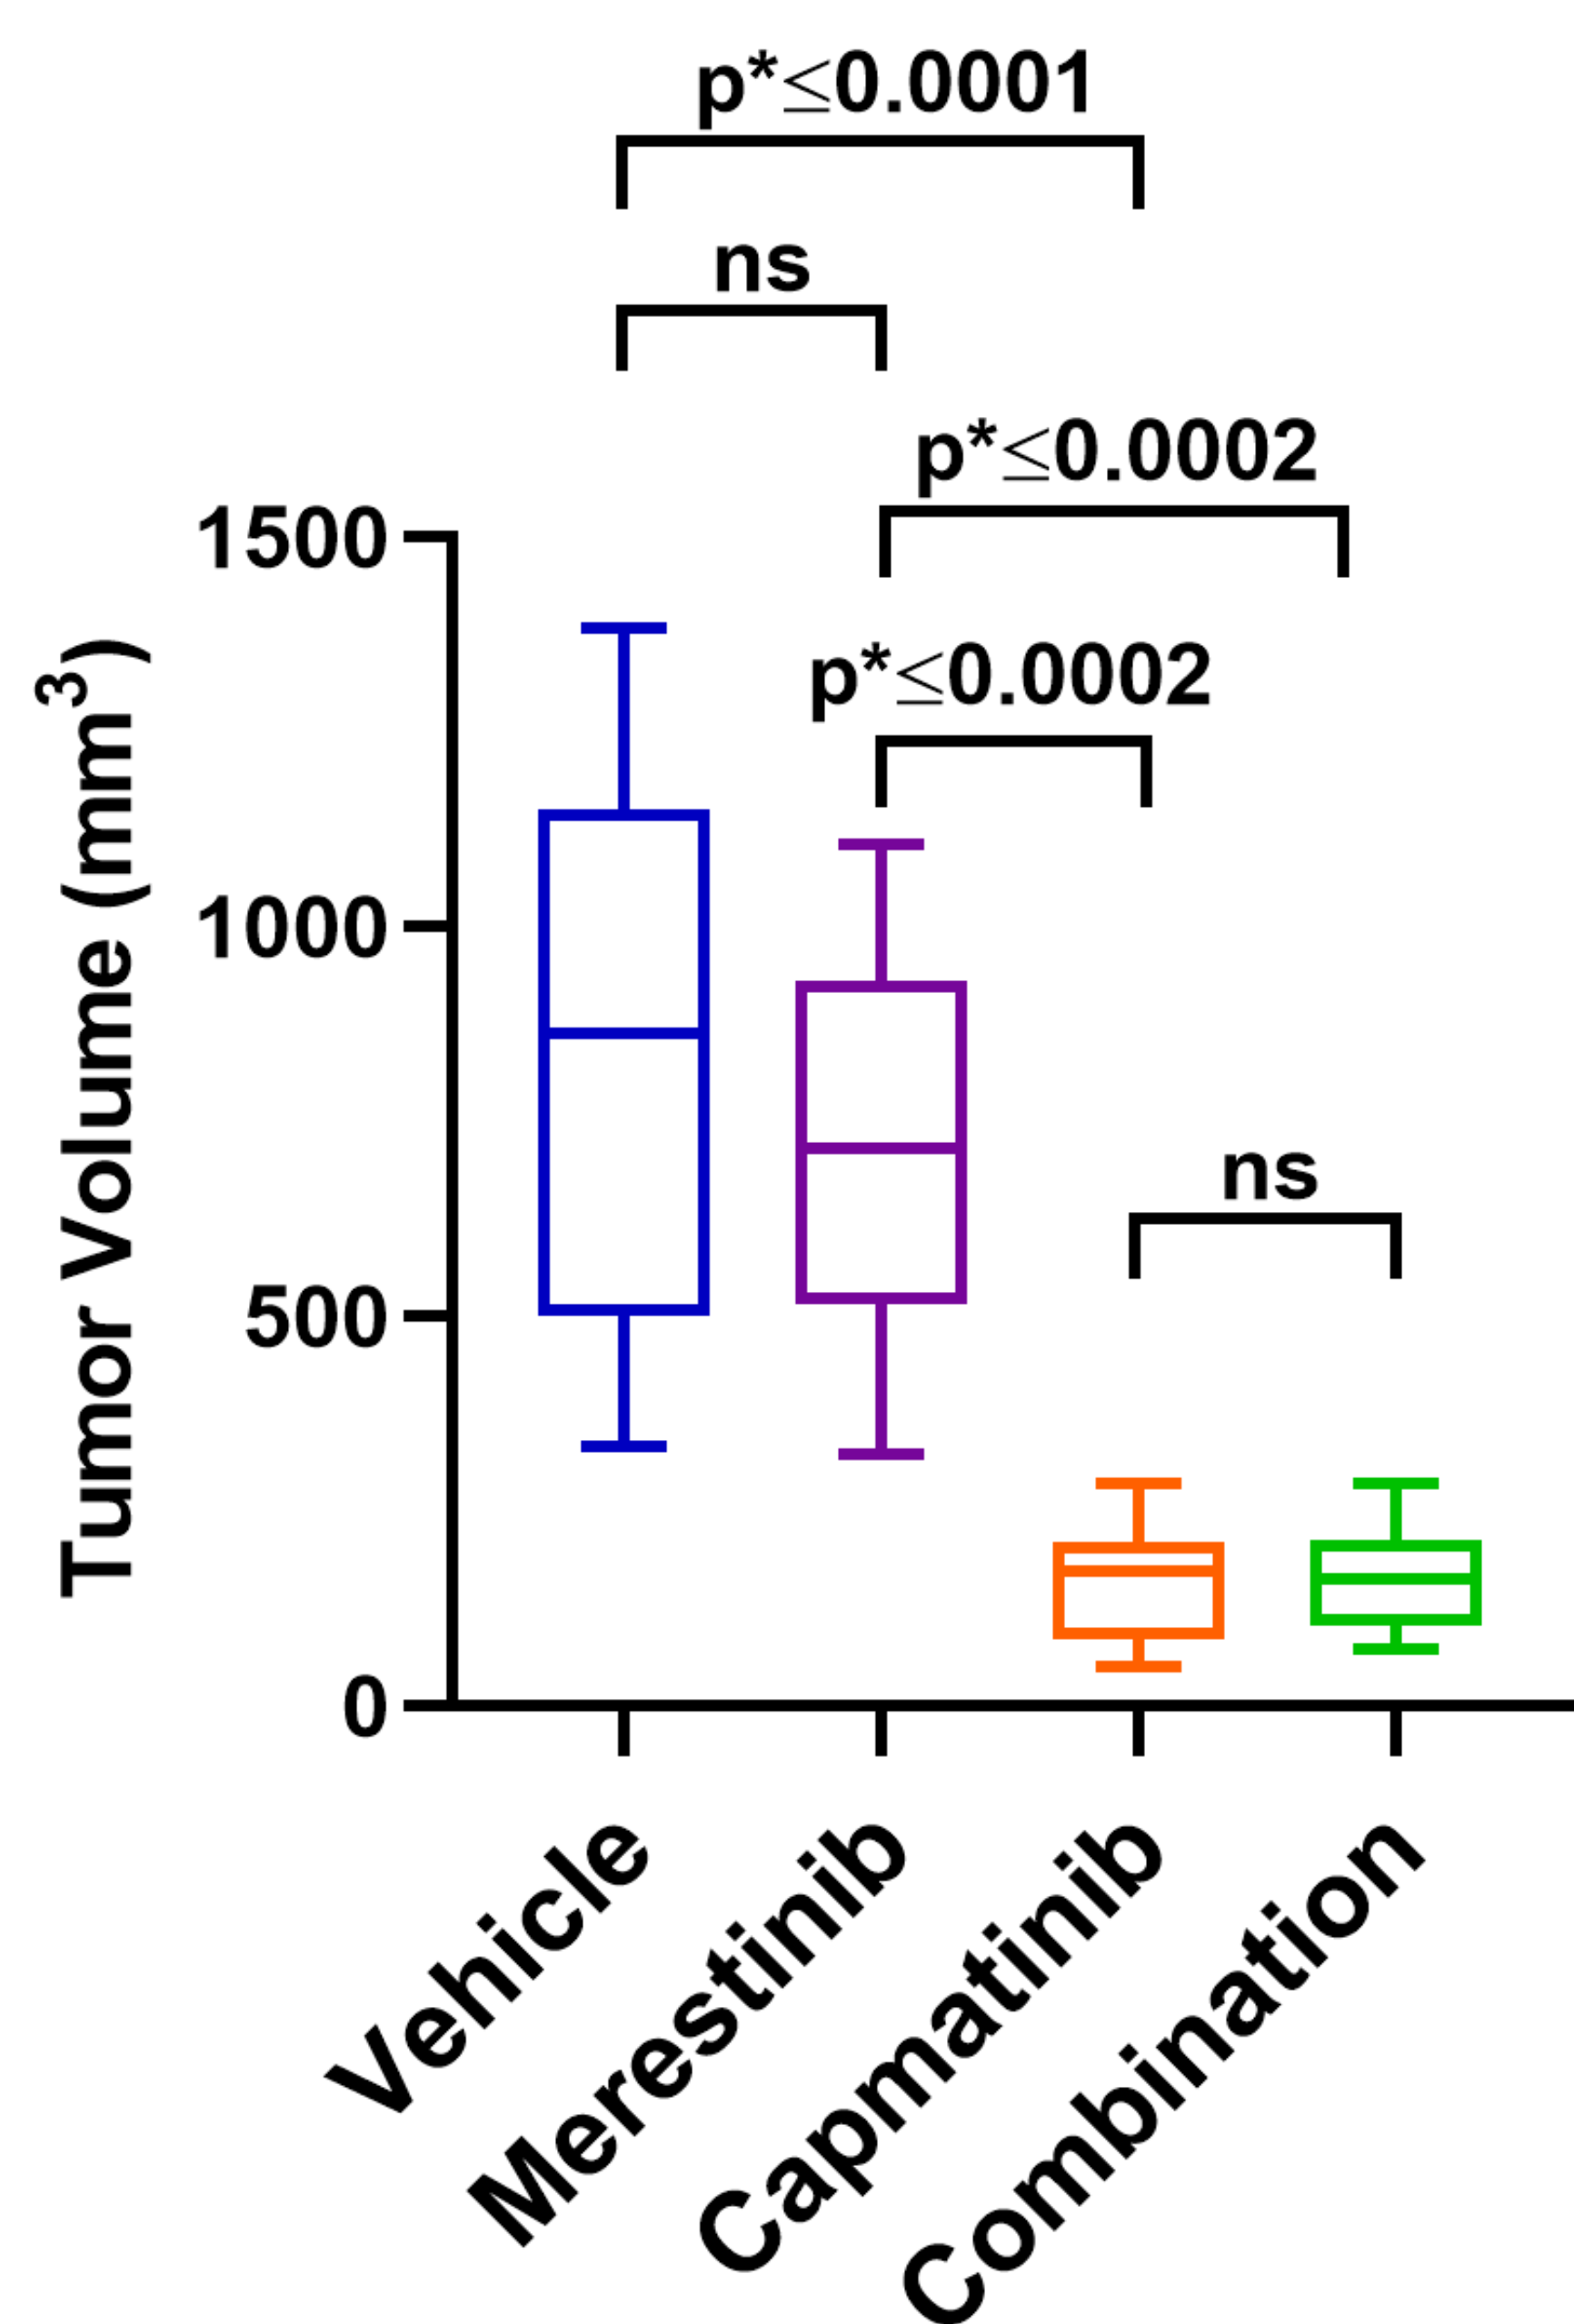

C

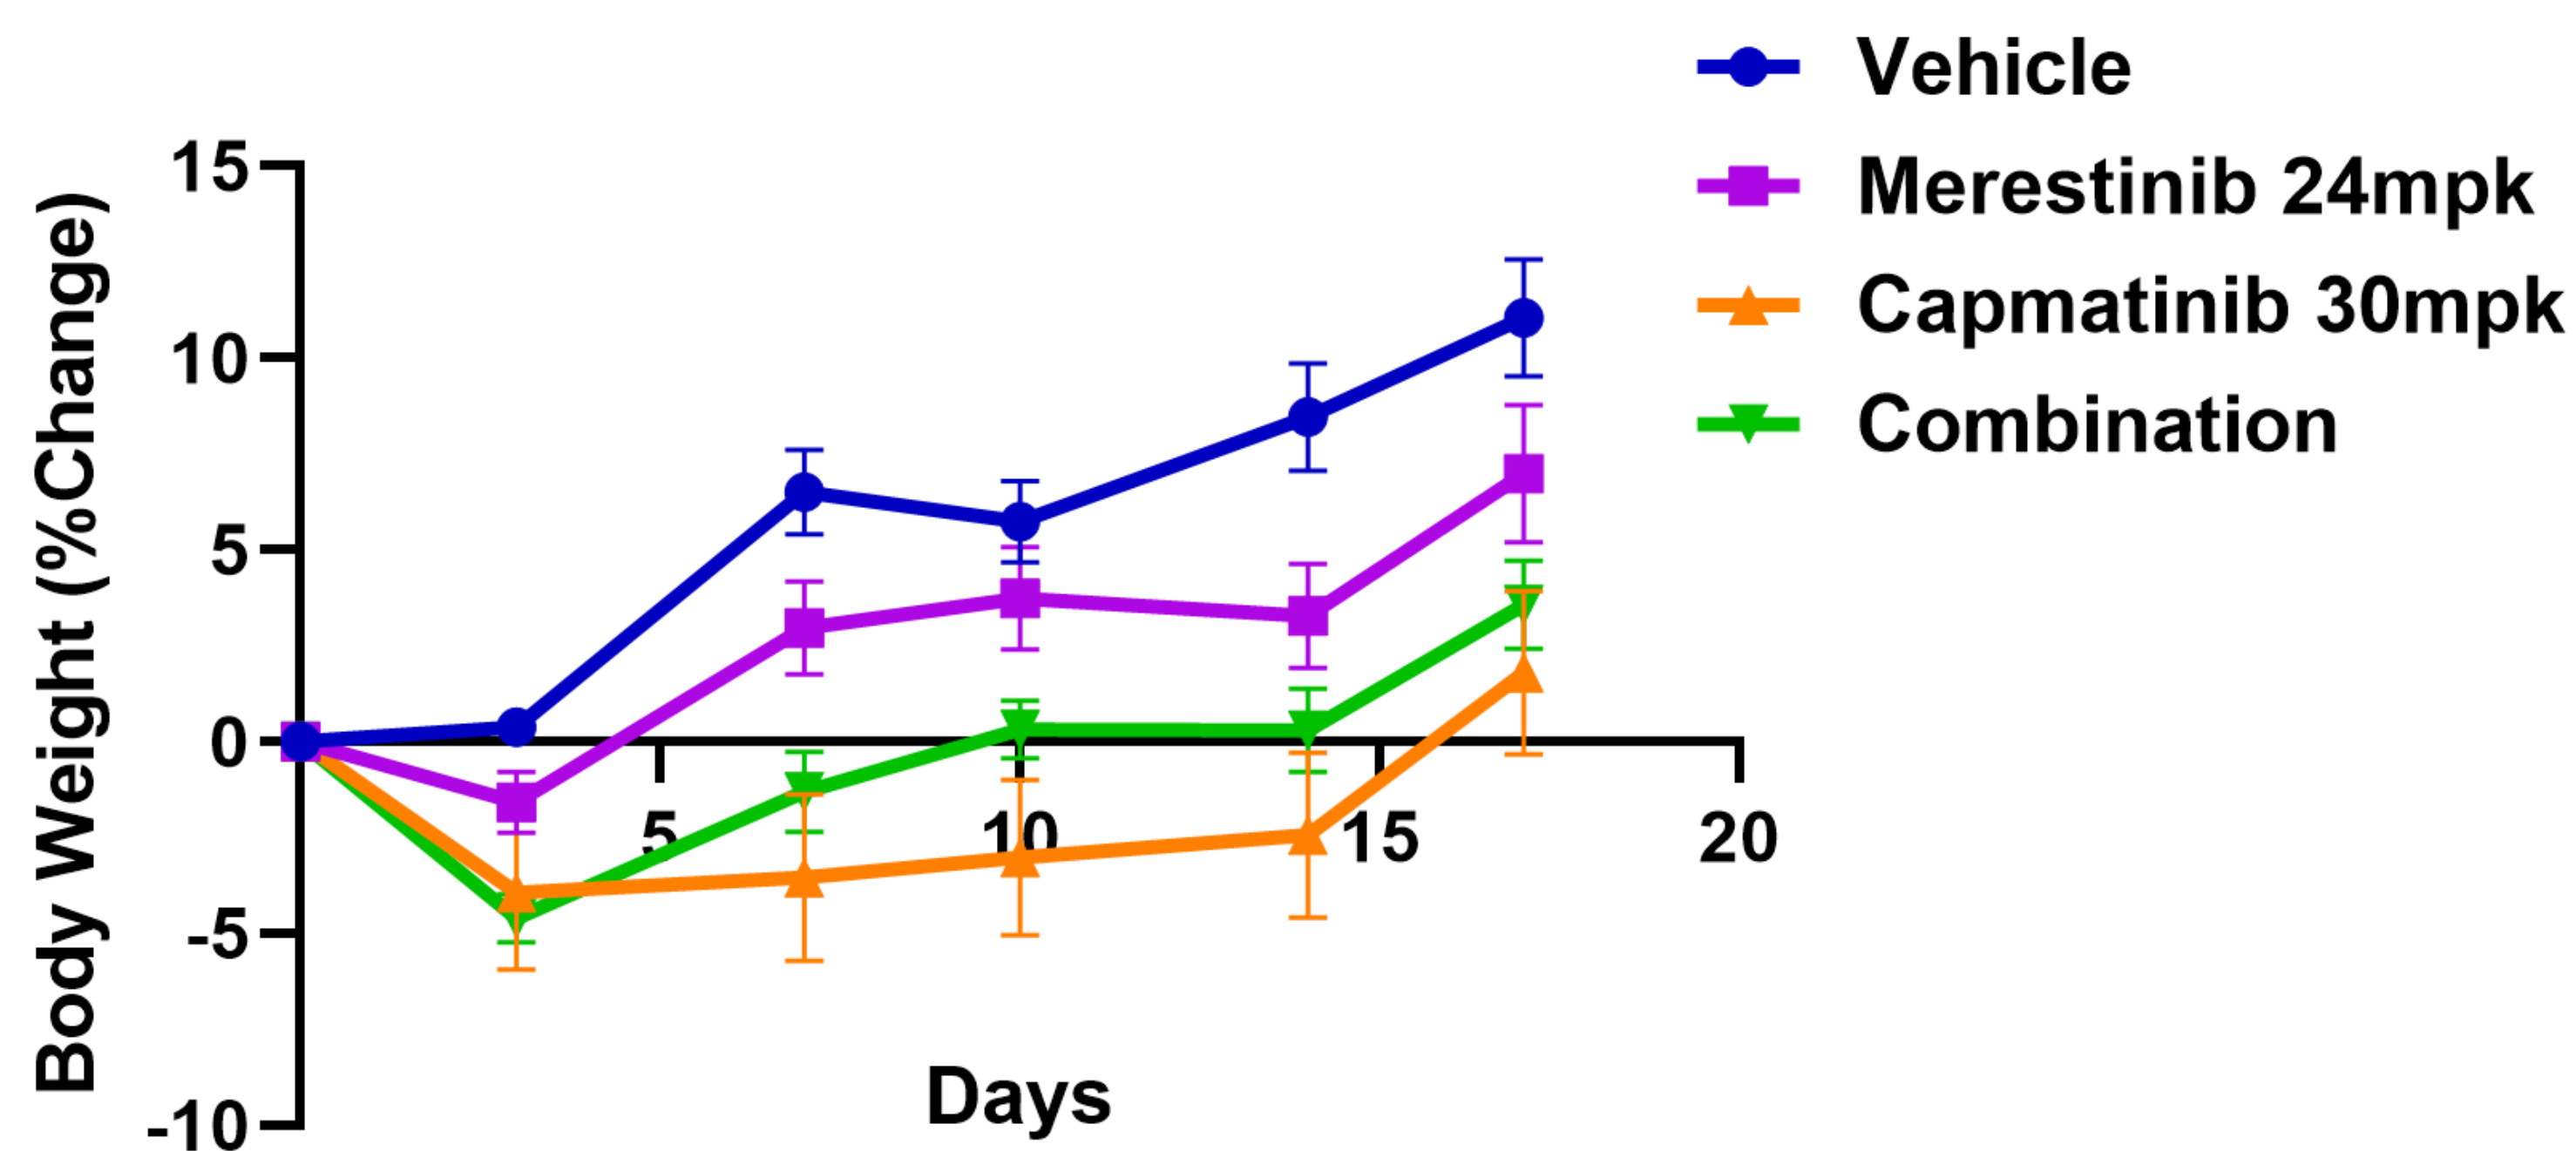

**Supplementary Figure S3.** The merestinib/capmatinib combination shows tolerability and efficacy against TPR-MET L1195V mutant *in vivo*. **A**, The Y1230H; G1163R; L1195V; F1200I TPR-MET Ba/F3 cell mixture was let proliferate *in vitro* in the absence of treatment for 18 days. The individual contribution of each TPR-MET mutant was determined by ddPCR at the end of the study and expressed as parts of a whole and percent of total mutant TPR-MET cell population. Error bars represent standard deviation of the mean. **B**, A box plot of volume of tumors harvested from mice on day 17 of treatment. P-values of < 0.05 were considered significant; ns = not significant. **C**, Plot of body weight percent change of treated mice as a function of treatment time.
